# Supplementary material
Source: Springer Nature journal article supplement (https://www.springermedizin.de/resource/supplementary/12997_2009_69_MOESM7_ESM.pdf/9623262)

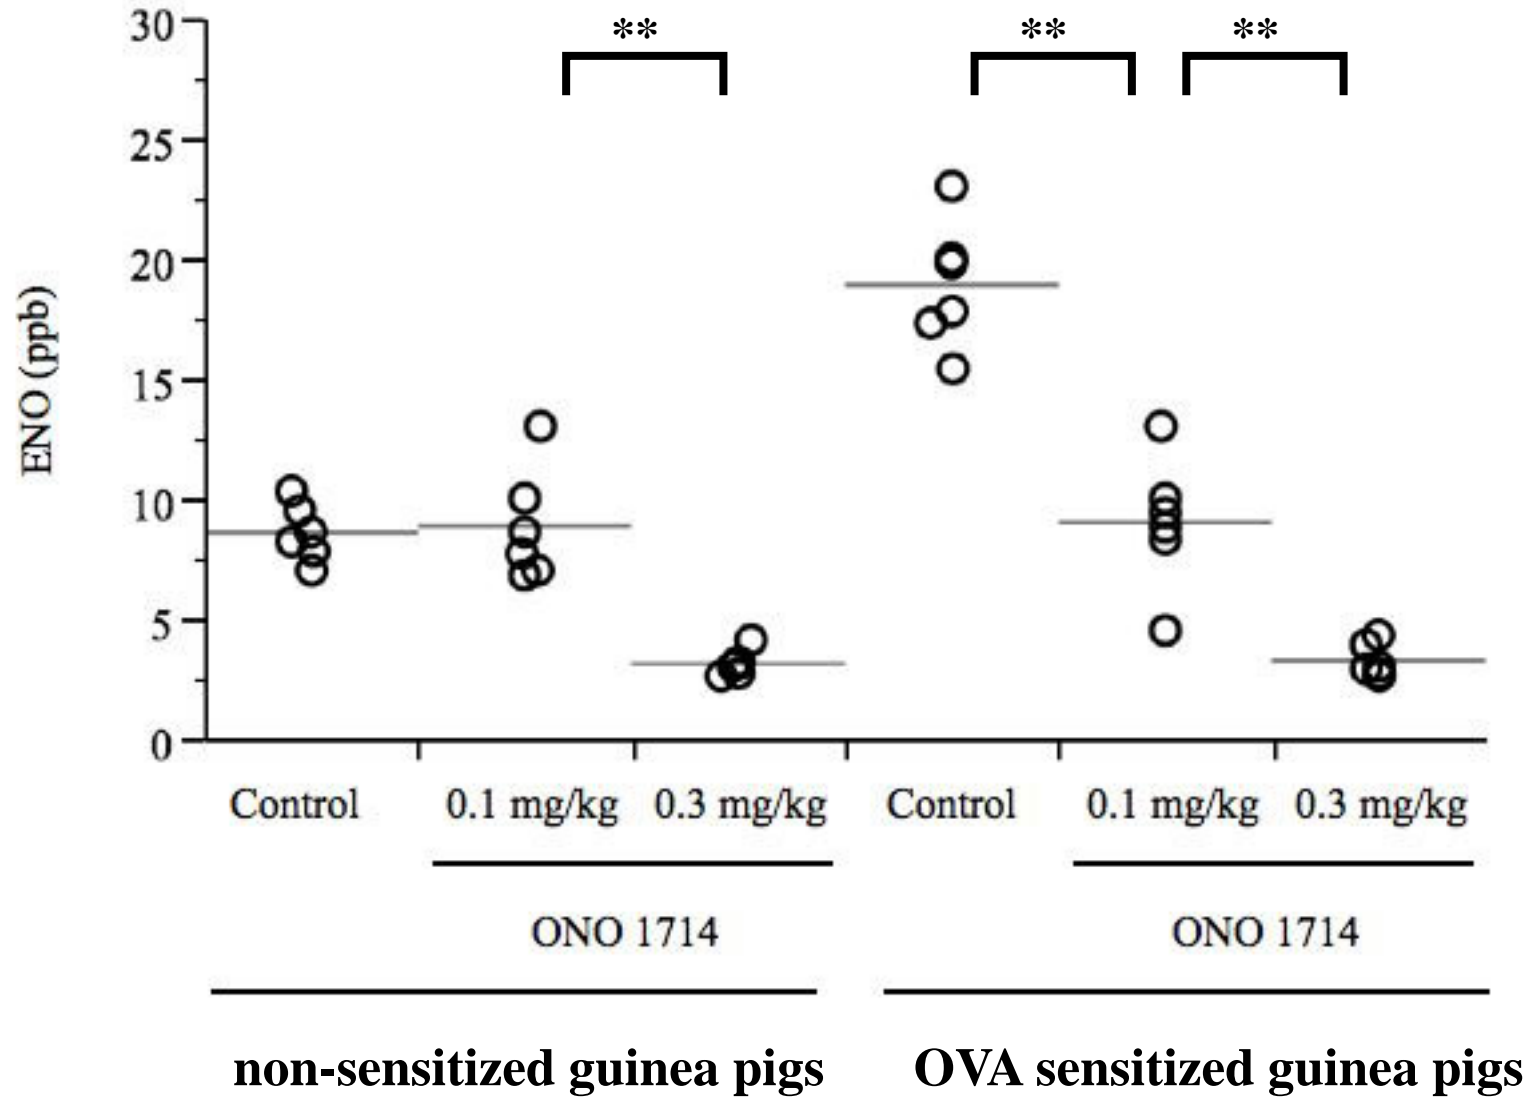

Supplement: MOESM7 [file 9623262]
